# Supplementary material for: Network generation enhances interpretation of proteomics data sets by a combination of two-dimensional polyacrylamide gel electrophoresis and matrix-assisted laser desorption/ionization-time of flight mass spectrometry
Source: Royal Society of Chemistry journal article supplement (doi:10.1039/c2an35891c), 2012-01-01
Supplement: c2an35891c.pdf [file c2an35891c.pdf]

**Table 1.** The results of identifications of differentially expressed proteins using MALDI-TOF/TOF MS.

| Spot                            | Record number | Name of protein                          | Score       |          | PI          |          | MW          |                                                                  | Functional classification |
|---------------------------------|---------------|------------------------------------------|-------------|----------|-------------|----------|-------------|------------------------------------------------------------------|---------------------------|
|                                 |               |                                          | Theoretical | Observed | Theoretical | Observed | Theoretical | Observed                                                         |                           |
| <b>Over-expressed proteins</b>  |               |                                          |             |          |             |          |             |                                                                  |                           |
| 1                               | gj 125144     | Ig kappa chain C                         | 185         | 4.97     | 5.02        | 11765    | 26051       | Immunity protection                                              |                           |
| 2                               | gj 55628      | Zinc finger protein                      | 489         | 6.09     | 6.49        | 70670    | 34886       | Regulation of transcription, translation and signal transduction |                           |
| 3                               | gj 61556986   | Serotransferrin                          | 275         | 7.14     | 5.87        | 78512    | 53532       | Transport and metabolism                                         |                           |
| 4                               | gj 33086640   | Haptoglobin                              | 318         | 6.11     | 5.71        | 43075    | 53590       | Transport and metabolism                                         |                           |
| 5                               | gj 12084772   | Macroglobulin                            | 250         | 5.78     | 5.83        | 15354    | 54878       | Generation and degradation of extra cellular matrix              |                           |
| 6                               | gj 203063     | Alpha-1-antitrypsin                      | 101         | 5.70     | 5.07        | 45978    | 61662       | Acute phase reaction and immunity protection                     |                           |
| 7                               | gj 46237594   | Complement factor                        | 97          | 6.57     | 5.96        | 86435    | 77040       | Cell growth and proliferation                                    |                           |
| <b>Under-expressed proteins</b> |               |                                          |             |          |             |          |             |                                                                  |                           |
| 8                               | gj 71824      | Fibrinogen alpha chain precursor         | 131         |          | 6.43        | 61162    | 38765       | Generation and degradation of extra cellular matrix              |                           |
| 9                               | gj 510196     | Glyceraldehyde-3-phosphate dehydrogenase | 140         | 7.57     | 7.56        | 78090    | 31613       | Metabolism                                                       |                           |
| 10                              | gj 158138568  | Albumin                                  | 208         | 6.09     | 6.75        | 70710    | 34348       | Regulation of the colloidal osmotic pressure of plasma.          |                           |
| 11                              | gj 17105350   | 2,4-dienoyl-CoA reductase,               | 103         | 9.18     | 4.71        | 30268    | 36531       | Cell apoptosis and oxidation reaction                            |                           |
| 12                              | gj 136467     | Transthyretin                            | 397         | 5.77     | 6.29        | 15824    | 42190       | Metabolic process                                                |                           |
| 13                              | gj 83816939   | $\alpha$ -1-inhibitor 3 precursor        | 303         | 5.70     | 5.84119     | 165038   | 60934       | Immunity                                                         |                           |
| 14                              | gj 203941     | Vitamin D-binding protein                | 126         | 5.76     | 5.44        | 55079    | 62398       | Modulate immunological processes                                 |                           |
| 15                              | gj 135809     | Prothrombin                              | 156         | 6.28     | 5.26        | 71792    | 91978       | Immunity                                                         |                           |

Note: Relative molecular weight (MW); Isoelectric point (PI)

**Table 2.** Top enriched biological processes networks for a combined set of differentially expressed proteins <sup>a</sup>.

| No. | Pathway                          | p-value |
|-----|----------------------------------|---------|
| 1   | DNA repair process.              | 0.0002  |
| 2   | Cell apoptosis                   | 0.0016  |
| 3   | Oxidation reduction              | 0.0051  |
| 4   | Signal transduction              | 0.0097  |
| 5   | Metabolic process                | 0.0187  |
| 6   | Intracellular signaling cascade  | 0.0225  |
| 7   | Regulation of biological process | 0.0274  |
| 8   | Cell communication               | 0.0298  |
| 9   | Regulation of cellular process   | 0.0346  |
| 10  | Molecular transport              | 0.0403  |

<sup>a</sup>The description of the gene ontology biological processes and the corresponding gene ontology identifiers are given.
